# Supplementary material for: Gram-scale green synthesis of a highly stable cationic covalent organic framework for efficient and selective removal of ReO4−/99TcO4−
Source: Royal Society of Chemistry journal article supplement (doi:10.1039/d4ta06442a), 2024-11-05
Supplement: d4ta06442a1.pdf [file d4ta06442a1.pdf]

## Supplementary Information

### **Gram-scale green synthesis of a highly stable cationic covalent organic framework for efficient and selective removal of $\text{ReO}_4^-/^{99}\text{TcO}_4^-$**

Changxia Li,<sup>\*a,b</sup> Justyna Florek,<sup>b</sup> Patrick Guggenberger<sup>b,c</sup> and Freddy Kleitz<sup>\*b</sup>

<sup>a</sup> School of Chemistry and Molecular Engineering, Nanjing Tech University, 211816 Nanjing, China

<sup>b</sup> Department of Functional Materials and Catalysis, Faculty of Chemistry, University of Vienna, 1090 Vienna, Austria

<sup>c</sup> Vienna Doctoral School in Chemistry (DoSChem), University of Vienna, 1090 Vienna, Austria

\*E-mail: [changxia.li@univie.ac.at](mailto:changxia.li@univie.ac.at); [freddy.kleitz@univie.ac.at](mailto:freddy.kleitz@univie.ac.at)

## 1. Experimental methods

### 1.1. Characterization methods

Wide-angle powder X-ray diffraction (XRD) patterns were carried out on a PANalytical EMPYREAN powder diffractometer equipped with the PIXcel<sup>3D</sup> detector (Malvern PANalytical, United Kingdom) in reflection geometry (Bragg–Brentano HD) using Cu K $\alpha_{1/2}$  radiation, operated at a voltage of 45 kV and a tube current of 40 mA, with a fixed divergence slit of 0.05 mm. The measurements were performed in the continuous mode with a step size  $2\theta$  of 0.013° and a data time per step of 300 s. Nitrogen physisorption isotherms were measured at –196 °C on an Anton Paar Quantatech Inc. iQ2 instrument (Boynton Beach, FL, USA). The sample was degassed under vacuum at 150 °C for 15 h before the measurement. The specific surface area ( $S_{\text{BET}}$ ) was calculated by using Brunauer-Emmett-Teller (BET) method on the adsorption isotherm. The pore size distribution plot was obtained from the adsorption branch of isotherms by the quenched solid density functional theory (QSDFT) model (slit/cylindrical pores, N<sub>2</sub> at 77 K on carbon). The CO<sub>2</sub> sorption measurement was performed at 25 °C on a Micromeritics 3FLEX (USA) sorption analyser. The sample was degassed under vacuum at 120 °C for 12 h before the measurement. Scanning electron microscopy (SEM) analyses were performed on a Zeiss Supra 55 VP electron microscope equipped with an EDS detector. The accelerating voltages are 5 kV and 20 kV for images and EDS mappings, respectively. Fourier transform infrared (FT-IR) spectra were measured on a Bruker VERTEX 70v FT-IR Spectrometer equipped with Specac Golden Gate ATR accessory. Thermogravimetric analysis (TGA) was recorded on a Netzsch instrument (STA 449-F3 Jupiter) from 25 to 800 °C at a heating rate of 10 °C min<sup>-1</sup> in air atmosphere (20 mL min<sup>-1</sup>). Solid-state magic angle spinning nuclear magnetic resonance spectroscopy (MAS NMR) spectra were performed on a Bruker Avance NEO 500 wide bore system (Bruker BioSpin, Rheinstetten, Germany). A 4 mm triple resonance magic angle spinning (MAS) probe was used. Cross-polarization (CP) was employed using a ramped contact pulse, thereby sweeping the proton radio frequency field from 50 to 100%. The resonance frequency for <sup>13</sup>C NMR was 125.78 MHz, the MAS rotor spinning was set to 14 kHz, and the CP contact time to 3 ms. The ReO<sub>4</sub><sup>-</sup> concentrations in the solution were determined on an Agilent 7800 inductively coupled plasma mass spectrometer (ICP-MS).

### 1.2. Materials synthesis

### 1.2.1. Synthesis of Tp

108 mmol hexamethylenetetramine (15.1 g), 49 mmol phloroglucinol (6.0 g), and 90 mL trifluoroacetic acid were refluxed at 100 °C for 2.5 h under N<sub>2</sub>. 150 mL HCl (3 M) was added slowly and the solution was heated at 100 °C for another 1 h. After cooling down, the solution was filtered through Celite and extracted with 350 mL of dichloromethane. After that, the solution was evaporated under reduced pressure to afford ~2.4 g of an off-white powder. Purification was carried out by sublimation.

### 1.2.2. Synthesis of the COF

PTSA (2.5g) and 856 mg DB were ground well, then 5 mL of water was added drop by drop. The mixture was ground thoroughly, then transferred into a bottle and 15 mL of water was added. The mixture was shaken well in a vortex shaker for 5 min. Then, 315 mg of Tp was added and the mixture was shaken for another 20 min. The red mixture was transferred into the autoclave with another 5 mL of water and kept in the oven at 125 °C for 24 h. Then, the red precipitate was filtered and sequentially washed with 3M HNO<sub>3</sub> and water. Finally, the collected solid was Soxhlet extracted with THF and dried at 100 °C to get TpDB-COF in ~96% yield.

## 2. Adsorption experiments

### 2.1. Batch experiments

All the experiments were conducted at room temperature (~25 °C) using the batch sorption method. The removal percentage (%) and the sorption capacity at equilibrium  $q_e$  (mg g<sup>-1</sup>) were calculated by the following equations:

$$\text{Removal (\%)} = \frac{C_0 - C_e}{C_0} \times 100\%$$

$$q_e = \frac{C_0 - C_e}{m} \times V$$

in which  $C_0$  (mg g<sup>-1</sup>) and  $C_e$  (mg g<sup>-1</sup>) are the initial and equilibrium concentrations of adsorbate,  $V$  (mL) is the volume of solution, and  $m$  (g) is the mass of sorbent.

## 2.2. Sorption kinetics

10 mg of TpDB-COF was added to 10 ml of aqueous solution containing 28 ppm of  $\text{ReO}_4^-$ . The mixture was shaken for 30 s, 1 min, 3 min, 5 min, and 10 min, respectively. The suspension was separated using a 0.22  $\mu\text{m}$  nylon membrane filter. The concentrations of metals remaining in the filtered solution were then analyzed by inductively coupled plasma mass spectrometry (ICP-MS).

## 2.3. Sorption isotherms

The  $\text{ReO}_4^-$  sorption isotherm experiments for TpDB-COF were conducted by varying the initial concentrations of  $\text{ReO}_4^-$  ranging from 28 to 2500 ppm with the solid/liquid ratio of 1 g  $\text{L}^{-1}$ . After being shaken for 14 h, the suspension was separated with a 0.22  $\mu\text{m}$  nylon membrane filter and the concentrations of remaining  $\text{ReO}_4^-$  were determined by ICP-MS.

The adsorption isotherms were analyzed by applying the Langmuir isotherm model. The Langmuir isotherm model was expressed according to the following equation:

$$\frac{C_e}{q_e} = \frac{1}{K_L q_m} + \frac{C_e}{q_m}$$

where  $q_m$  is the maximum adsorption capacity of adsorbent ( $\text{mg g}^{-1}$ ) and  $K_L$  is the Langmuir constant ( $\text{L mg}^{-1}$ ). By fitting each isotherm with this model, values of  $q_m$  and  $K_L$  were obtained.

## 2.4. pH effect study

The solution pH was tuned by adding negligible volumes of diluted  $\text{HNO}_3$  or  $\text{NaOH}$ . The effect of pH for the  $\text{ReO}_4^-$  uptake was carried out by ranging pH values from 1 to 13. 10 mg of TpDB-COF was added to 10 ml of an aqueous solution containing 200 ppm of  $\text{ReO}_4^-$ . After being shaken for 14 h, the resulting mixture was separated with a 0.22  $\mu\text{m}$  nylon membrane filter and the concentrations of remaining  $\text{ReO}_4^-$  were determined by ICP-MS.

## 2.5. Anion competition study

The effect of competing ions was studied and carried out at the solid/liquid ratio of 1 g  $\text{L}^{-1}$ , room temperature. The effect of  $\text{H}_2\text{PO}_4^-$ ,  $\text{SO}_4^{2-}$ ,  $\text{ClO}_4^-$ ,  $\text{CO}_3^{2-}$ ,  $\text{NO}_3^-$ , or  $\text{Cl}^-$  was studied by loading 0.5 mM

NaH<sub>2</sub>PO<sub>4</sub>, Na<sub>2</sub>SO<sub>4</sub>, NaClO<sub>4</sub>, Na<sub>2</sub>CO<sub>3</sub>, NaNO<sub>3</sub>, or NaCl solution into a 0.5 mM ReO<sub>4</sub><sup>-</sup> solution, respectively. The influence of excessive NO<sub>3</sub><sup>-</sup> was screened by adding different concentrations of NaNO<sub>3</sub> (0.15 mM, 0.75 mM, 1.5 mM, 3 mM, and 15 mM) into a 0.15 mM ReO<sub>4</sub><sup>-</sup> solution. The influence of excessive SO<sub>4</sub><sup>2-</sup> was investigated by adding different concentrations of Na<sub>2</sub>SO<sub>4</sub> (0.08 mM, 0.8 mM, 8.0 mM, 80 mM, and 480 mM) into a 0.08 mM ReO<sub>4</sub><sup>-</sup> solution. After being shaken for 14 h, the suspensions were separated with a 0.22 μm nylon membrane filter and the concentrations of the remaining ReO<sub>4</sub><sup>-</sup> were determined by ICP-MS.

## **2.6. Batch experiments in 1M NaOH and 1M HNO<sub>3</sub> system**

2 mg, 4 mg, 10 mg, 20 mg or 40 mg of TpDB-COF were added into 2 ml of 1M NaOH or 1M HNO<sub>3</sub> solution containing 200 ppm of ReO<sub>4</sub><sup>-</sup>, respectively. After shaking it for 14 h, the suspension was separated with a 0.22 μm nylon membrane filter and the concentrations of remaining ReO<sub>4</sub><sup>-</sup> were determined by ICP-MS.

## **2.7. Recyclability study**

The recyclability was measured in a neutral aqueous solution with an initial ReO<sub>4</sub><sup>-</sup> concentration of 28 ppm and a 1 M HNO<sub>3</sub> aqueous solution containing 200 ppm ReO<sub>4</sub><sup>-</sup>, respectively. In the first cycle, 60 mg TpDB-COF was immersed into the ReO<sub>4</sub><sup>-</sup> aqueous solution and shaken for 14 h. The concentrations of the remaining ReO<sub>4</sub><sup>-</sup> were determined by ICP-MS. After that, the adsorbed material was eluted using 60 ml of 1 M NaBr solution at room temperature overnight, followed by washing with distilled water three times. The regenerated material was used for the next cycling test.

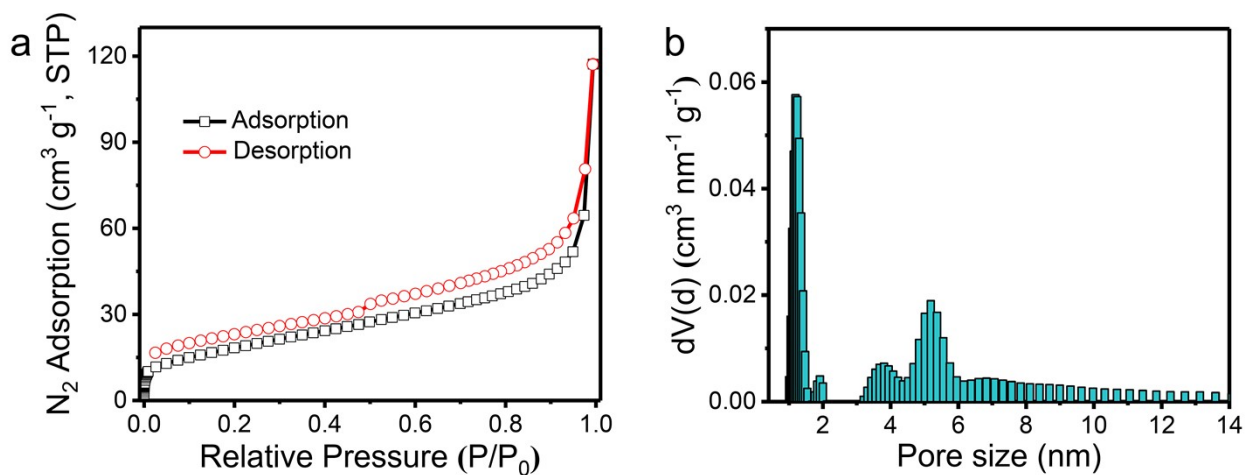

Figure S1. (a)  $N_2$  adsorption-desorption isotherm ( $-196\text{ }^\circ\text{C}$ ) and (b) QSDFT pore size distribution of TpDB-COF.

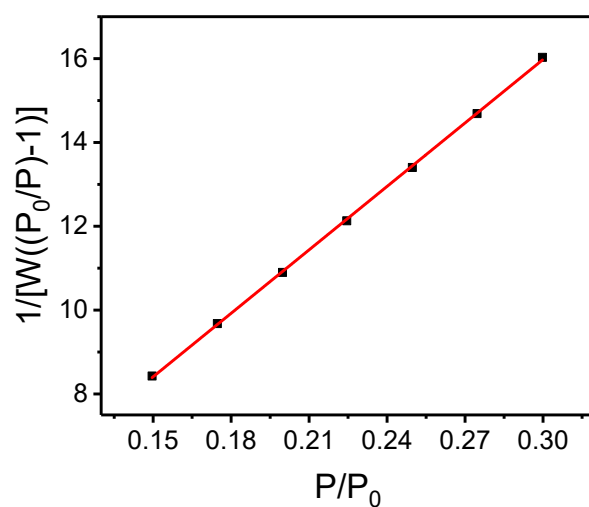

Figure S2. Linear range of the BET specific surface area plot calculated for the TpDB-COF  $N_2$  physisorption isotherm.

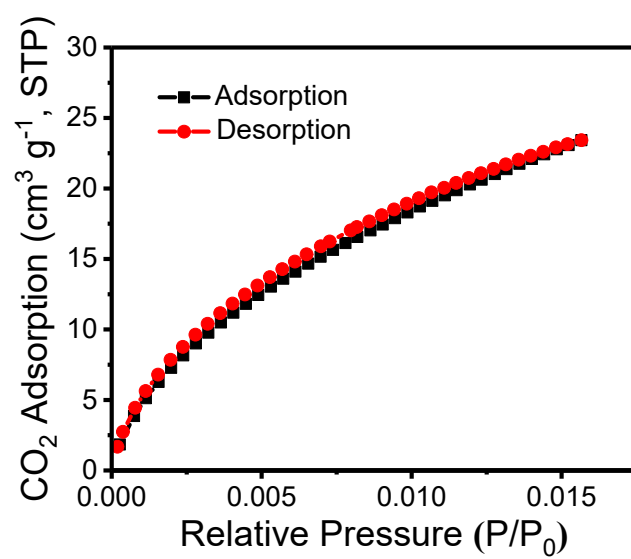

Figure S3. CO<sub>2</sub> adsorption-desorption isotherm of TpDB-COF measured at 25 °C.

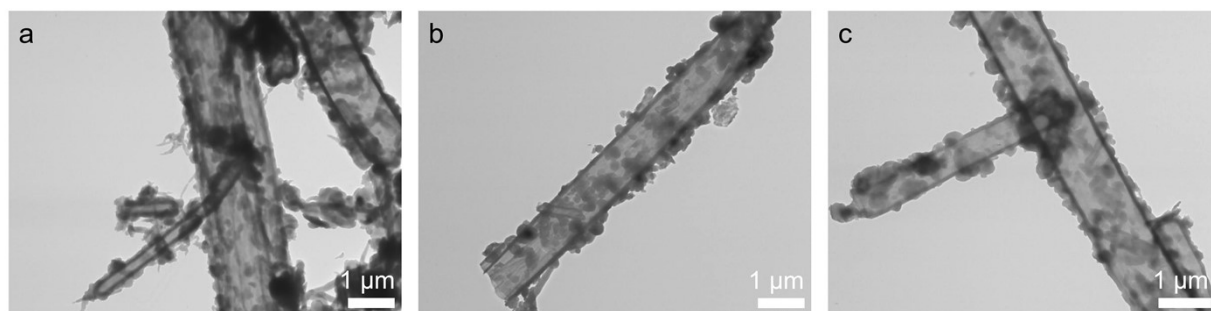

Figure S4. TEM images of (a) TpDB-COF, and TpDB-COF after treatment with (b) 3 M HNO<sub>3</sub> for 14 days and (c) 3 M NaOH for 4 days.

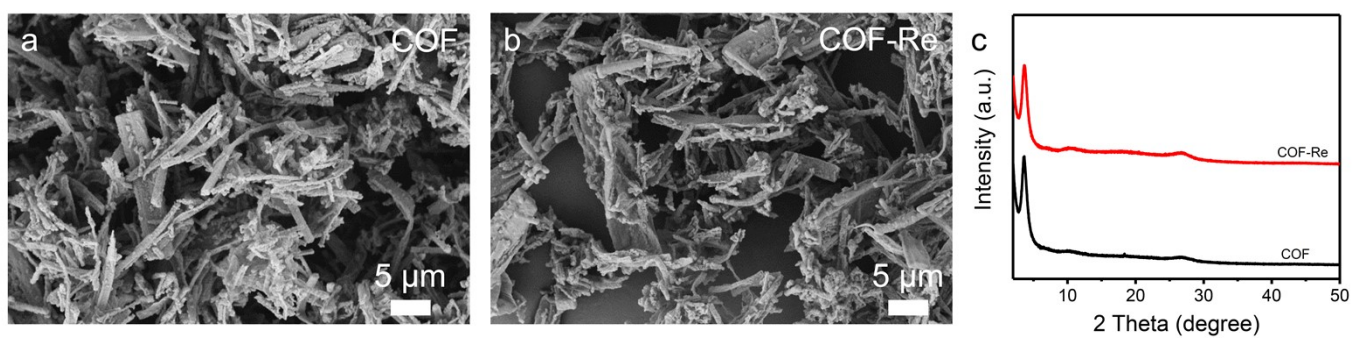

Figure S5. SEM images of (a) TpDB-COF, (b) TpDB-COF-Re, and (c) powder XRD patterns of COF and COF-Re.

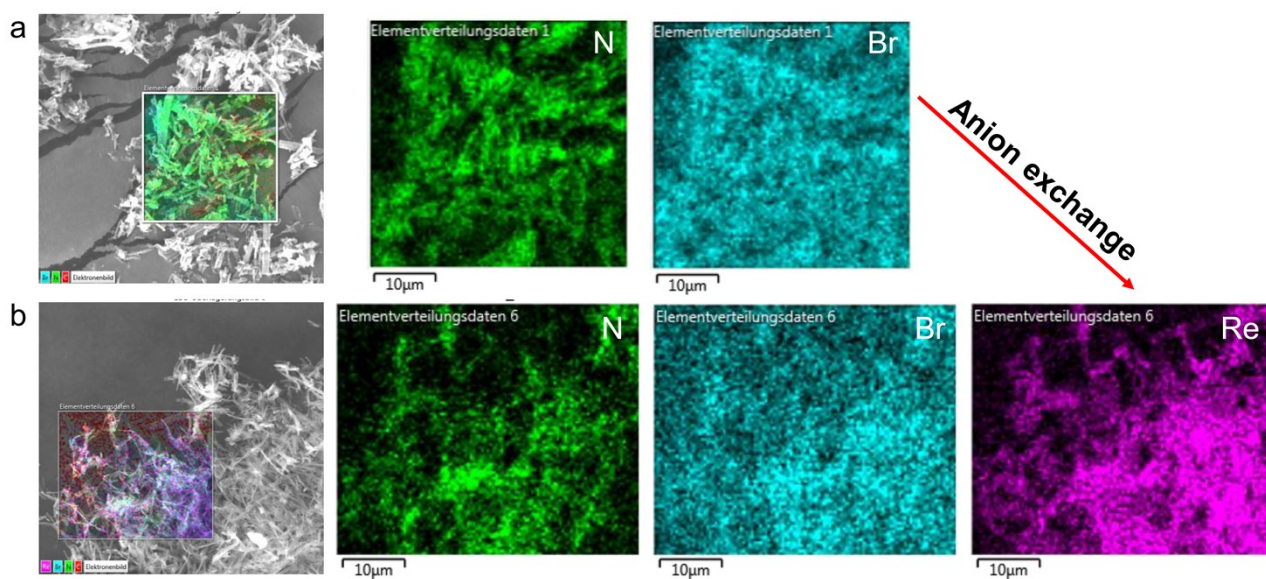

Figure S6. SEM and EDS mapping images of (a) TpDB-COF and (b) TpDB-COF-Re.



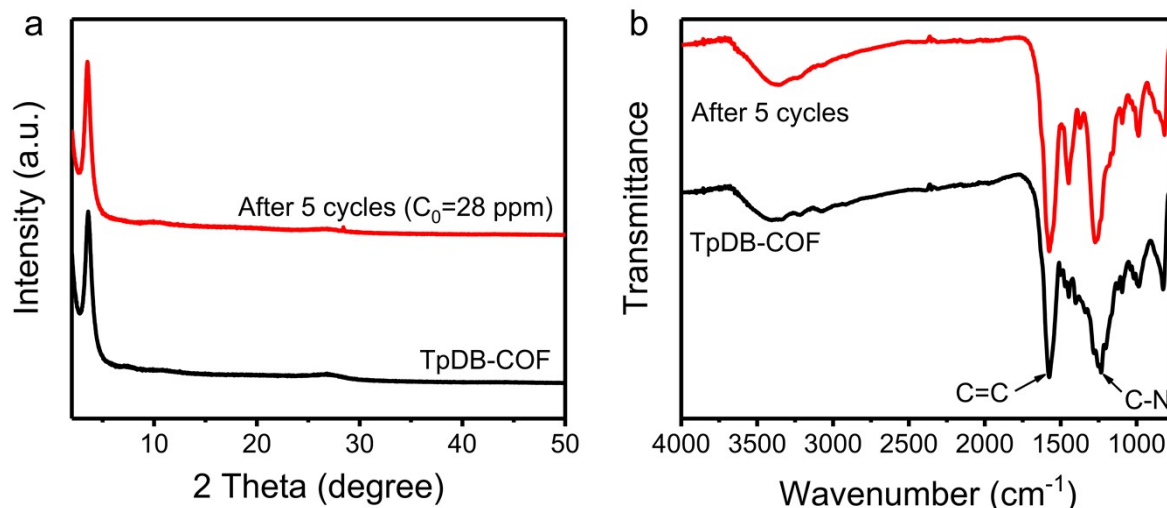

Figure S7. (a) Powder XRD patterns and (b) FT-IR spectra of fresh TpDB-COF and the sample after 5 cycles with initial concentration of  $\text{ReO}_4^- \sim 28$  ppm (solid/liquid ratio of  $1 \text{ mg mL}^{-1}$ ).

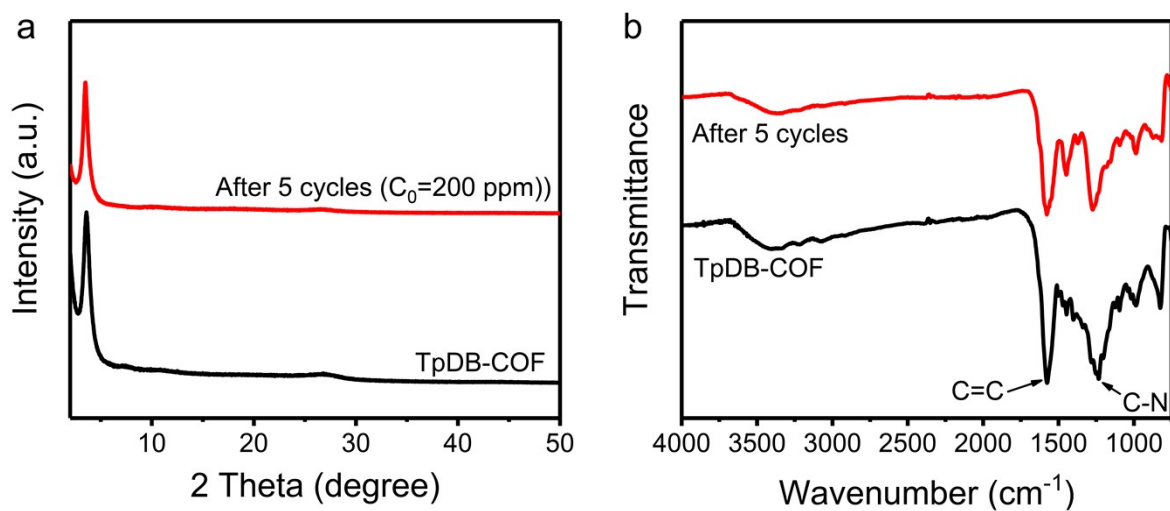

Figure S8. (a) Powder XRD patterns and (b) FT-IR spectra of fresh TpDB-COF and the sample after 5 cycles in  $1 \text{ M HNO}_3$  with initial concentration of  $\text{ReO}_4^- \sim 200$  ppm (solid/liquid ratio of  $20 \text{ mg mL}^{-1}$ ).

Table S1. Comparison of reaction solvents, reaction time, product per batch, equilibrium time and adsorption capacities of TpDB-COF with other MOF/COF-based adsorbents.

| Materials                        | Reaction solvents                       | Reaction time                   | Product per batch (g) | Adsorption equilibration time (min) | Adsorption capacity (mg g <sup>-1</sup> ) | Refs      |
|----------------------------------|-----------------------------------------|---------------------------------|-----------------------|-------------------------------------|-------------------------------------------|-----------|
| SCU-COF-1                        | 1,2-dichlorobenzene                     | 120 °C 6d                       | <0.025 <sup>a</sup>   | 1                                   | 367.6                                     | 1         |
| DhaTGCI                          | THF/H <sub>2</sub> O                    | 120 °C 3d                       | 0.072                 | 5                                   | 437                                       | 2         |
| [C2vimBr] <sub>x</sub> %TbDa-COF | 1,2-dichlorobenzene/<br>n-butylalcohol  | 120 °C 3d                       | 0.099                 | 30                                  | 952                                       | 3         |
| MOF-SCU-101                      | DMF, Ethanol, H <sub>2</sub> O          | 100 °C 3d                       | 0.491                 | 10                                  | 247                                       | 4         |
| UiO-66-NH <sub>2</sub>           | DMF                                     | 120 °C 1d                       | 0.65                  | ~720                                | 159                                       | 5         |
| Poly(ionic liquids)@MOF          | DMF                                     | 200 °C 1d                       | -                     | 0.5                                 | 362                                       | 6         |
| MOF-SCU-103                      | DMF/H <sub>2</sub> O                    | 140 °C 3d                       | 0.065                 | 5                                   | 318                                       | 7         |
| Olefin-COF                       | Mesitylene/1,4-dioxane/<br>acetonitrile | 150 °C 3d                       | 0.032                 | 1                                   | 726                                       | 8         |
| Vinylene-3D COF                  | Mesitylene/1,4-dioxane                  | 150 °C 3d                       | 0.025                 | 0.5                                 | 542.3                                     | 9         |
| PS-COF-1                         | mesitylene/<br>ethanol                  | 80 °C 3d                        | <0.08 <sup>a</sup>    | 180                                 | 1262                                      | 10        |
| PIL@MOF@COF                      | n-butyl alcohol/o-dichlorobenzene       | 120 °C 3d                       | <0.245 <sup>a</sup>   | 2                                   | 382                                       | 11        |
| SCU-CPN-1                        | DMF                                     | 100 °C 4h<br>(150 psi,<br>150W) | 0.154                 | 0.5                                 | 876                                       | 12        |
| TpDB-COF                         | H <sub>2</sub> O                        | 125 °C 1d                       | 1.12                  | 1                                   | 570.4                                     | This work |

<sup>a</sup> The yield was not given. The calculation is based on the amount of reaction precursors.

## Reference

1. L. He, S. Liu, L. Chen, X. Dai, J. Li, M. Zhang, F. Ma, C. Zhang, Z. Yang, R. Zhou, Z. Chai, S. Wang, *Chem. Sci.*, 2019, **10**, 4293.
2. H. J. Da, C. X. Yang and X. P. Yan, *Environ. Sci. Technol.*, 2019, **53**, 5212.
3. Y. Wang, M. Xie, J. Lan, L. Yuan, J. Yu, J. Li, J. Peng, Z. Chai and W. Shi, *Chem*, 2020, **6**, 2796.
4. L. Zhu, D. Sheng, C. Xu, X. Dai, M. A. Silver, J. Li, P. Li, Y. Wang, Y. Wang, L. Chen, C. Xiao, J. Chen, R. Zhou, C. Zhang, O. M. Farha and Z. Chai, T. E. Albrecht-Schmitt and S. Wang, *J. Am. Chem. Soc.*, 2017, **139**, 14873.
5. D. Banerjee, W. Xu, Z. Nie, L. E. Johnson, C. Coghlan, M. L. Sushko, D. Kim, M. J. Schweiger, A. A. Kruger, C. J. Doonan, P. K. Thallapally, *Inorg. Chem.*, 2016, **55**, 8241.
6. C.-P. Li, H.-R. Li, J.-Y. Ai, J. Chen and M. Du, *ACS Cent. Sci.*, 2020, **6**, 2354.
7. N. Shen, Z. Yang, S. Liu, X. Dai, C. Xiao, K. Taylor-Pashow, D. Li, C. Yang, J. Li, Y. Zhang, M. Zhang, R. Zhou, Z. Cai and S. Wang, *Nat. Commun.*, 2020, **11**, 5571.
8. W.-R. Cui, W. Xu, Y.-R. Chen, K. Liu, W.-B. Qiu, Y. Li and J.-D. Qiu, *J. Hazard. Mater.*, 2023, **446**, 130603.
9. C. R. Zhang, W. R. Cui, S. M. Yi, C. P. Niu, R. P. Liang, J. X. Qi, X. J. Chen, W. Jiang, X. Liu, Q. X. Luo and J. D. Qiu, *Nat. Commun.*, 2022, **13**, 7621.
10. M. Hao, Z. Chen, H. Yang, G. I. Waterhouse, S. Ma and X. Wang, *Sci. Bull.*, 2022, **67**, 924.
11. Z. Di, Z.-F. Liu, H.-R. Li, Z. Liu and C.-P. Li, *Inorg. Chem. Front.*, 2023, **10**, 952.
12. J. Li, X. Dai, L. Zhu, C. Xu, D. Zhang, M. A. Silver, P. Li, L. Chen, Y. Li, D. Zuo, H. Zhang, C. Xiao, J. Chen, J. Diwu, O. K. Farha, T. E. Albrecht-Schmitt, Z. Chai and S. Wang, *Nat. Commun.*, 2018, **9**, 3007.
